# Supplementary material for: Matriptase regulates c-Met mediated proliferation and invasion in inflammatory breast cancer
Source: PubMed Central journal article supplement (PMC5295421; doi:10.18632/oncotarget.11262), 2016-08-12
Supplement: oncotarget-07-58162-s001.pdf [file oncotarget-07-58162-s001.pdf]

## Matriptase regulates c-Met mediated proliferation and invasion in inflammatory breast cancer

### Supplementary Materials

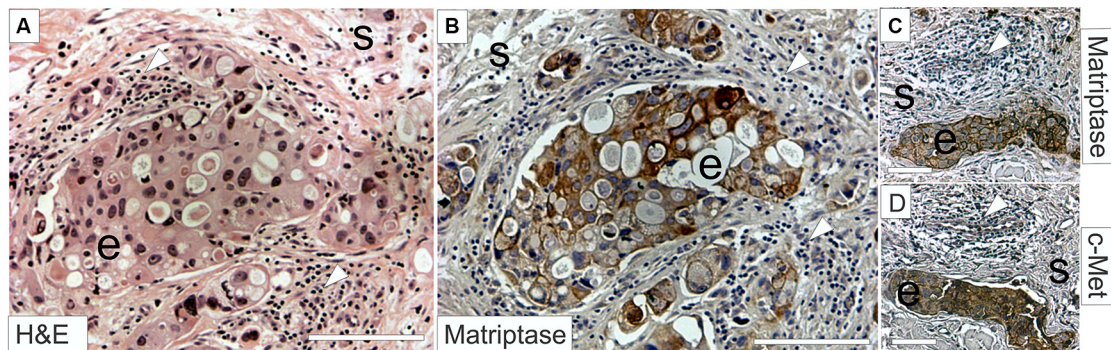

**Supplementary Figure S1: Matriptase and c-Met protein expression in areas with inflammation.** Representative serial sections of human IBC. (A) H&E staining of IBC with inflammation (primarily lymphocytes). IHC using a rabbit anti-matriptase antibody (B, C) or a rabbit anti c-Met antibody (D) Matriptase, and c-Met are primarily localized on cell surfaces (brown staining) of invasive epithelia derived IBC cells (indicated with 'e') with no significant staining in the mesenchymal/stromal compartments (indicated with 's') and display highly similar expression patterns. Inflammatory areas are indicated with arrowheads. IHC tissues were counterstained with haematoxylin (blue/grey). Scale bars, 50  $\mu$ m.

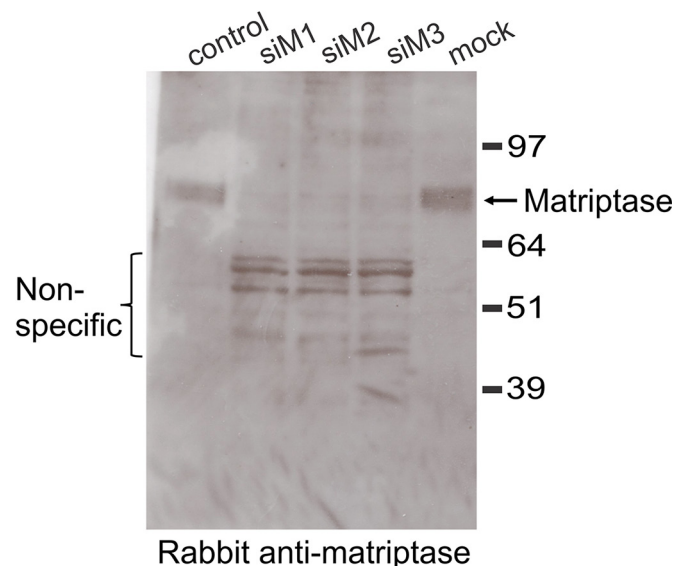

**Supplementary Figure S2: Matriptase knock-down in SUM149 cells.** Full PVDF membrane showing RNAi silencing of matriptase in SUM149 cells with three independent non-overlapping synthetic RNA duplexes (siM1, siM2, and siM3). A %GC matched RNA duplex was used as negative control as well as a mock where no RNA duplex was added. Rabbit anti-matriptase (Calbiochem/EMD Millipore, San Diego, CA) was used for detection.
